# Supplementary material for: Performance of a tool to identify different types of self-reported sexual risk among women attending a contraception and sexual health clinic: results of a cross-sectional survey
Source: PubMed Central journal article supplement — BMJ Sex Reprod Health. 2020 Jun 4;47(2):117–28. doi: 10.1136/bmjsrh-2019-200482 (PMC8053341; doi:10.1136/bmjsrh-2019-200482), 2020-06-04

**Receiver Operating Curves for each outcome modelled from sexual health clinic data****Area under the Receiver Operating Curve for two or more male partners in the last year**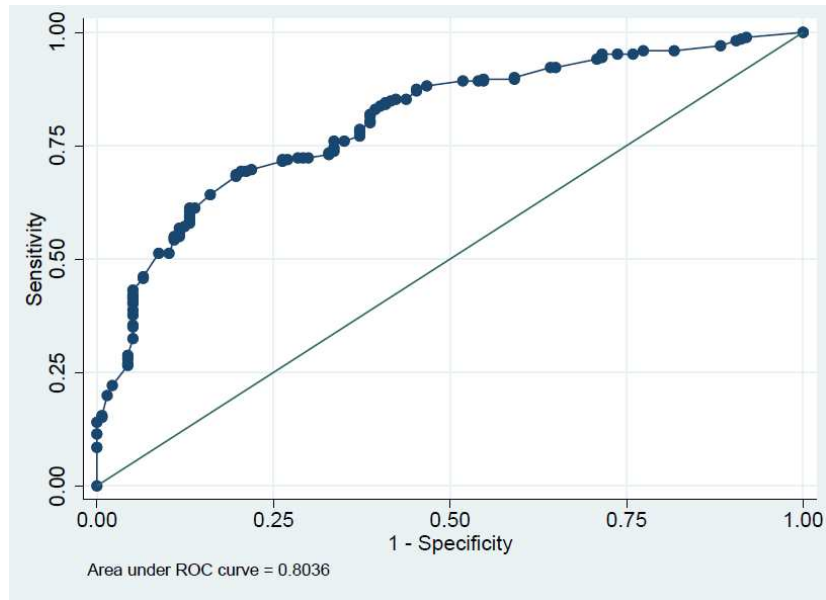**Area under the Receiver Operating Curve for combined risk (two or more male partners in the last year or risk through partner)**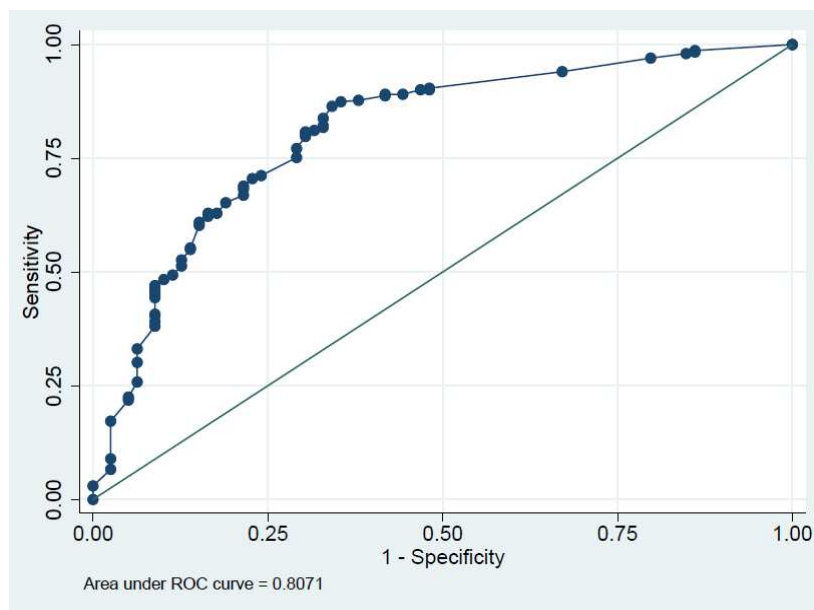

**Area under the Receiver Operating Curve for Risk of Unintended Pregnancy in the last 6 months**

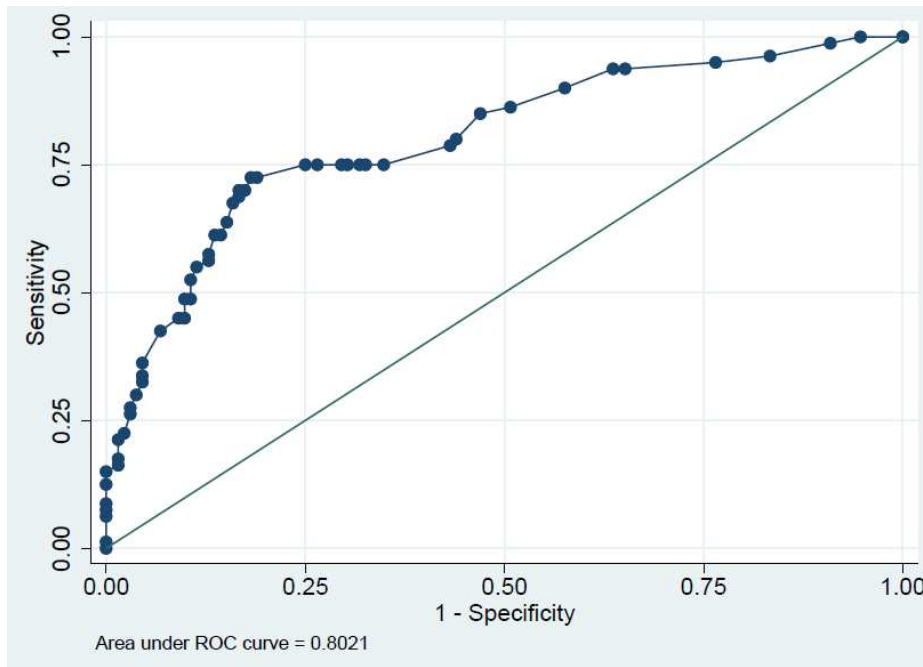

Supplement: bmjsrh-2019-200482supp001.pdf [file bmjsrh-2019-200482supp001.pdf]
